# Supplementary figures and images for: High throughput imaging cytometer with acoustic focussing
Source: Royal Society of Chemistry journal article supplement (doi:10.1039/c5ra19497k), 2015-01-01

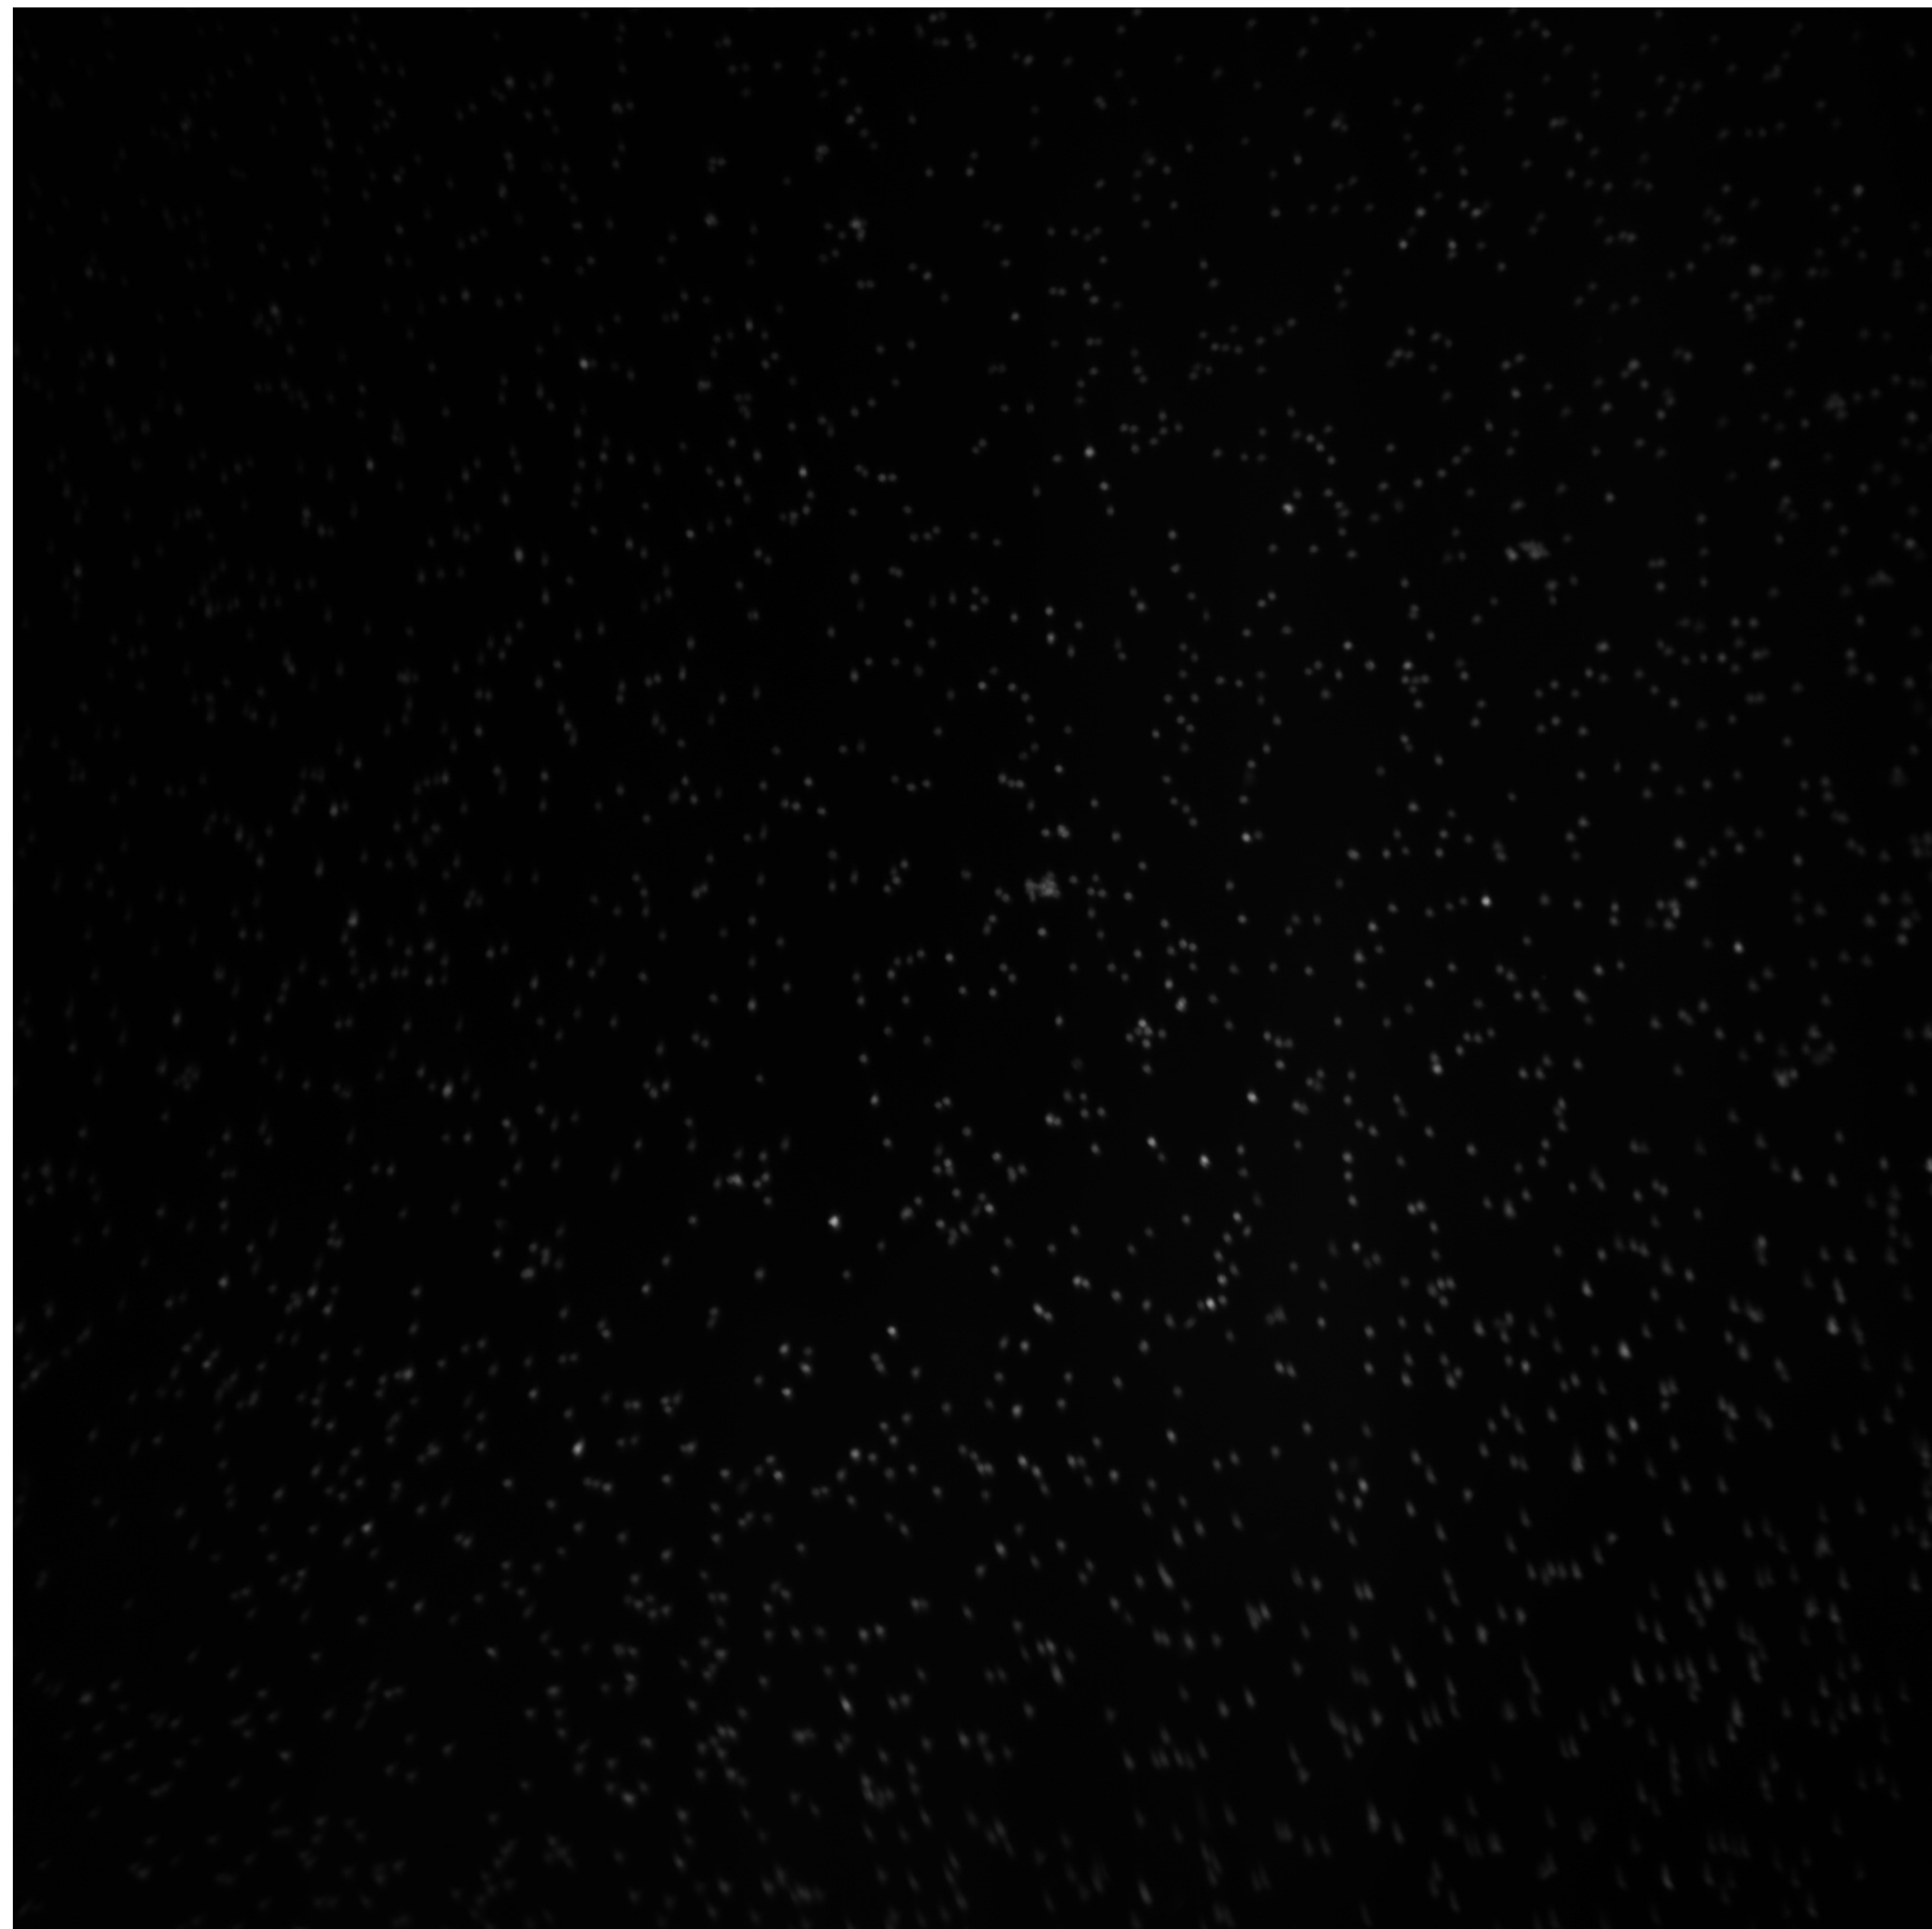

Supplement: c5ra19497k6.pdf [file c5ra19497k6.pdf]
