# Supplementary figures and images for: High throughput imaging cytometer with acoustic focussing
Source: PubMed Central journal article supplement — RSC Adv. 2015 Oct 1;5(101):83206–16. doi: 10.1039/c5ra19497k (PMC5782801; doi:10.1039/c5ra19497k), 2015-10-01

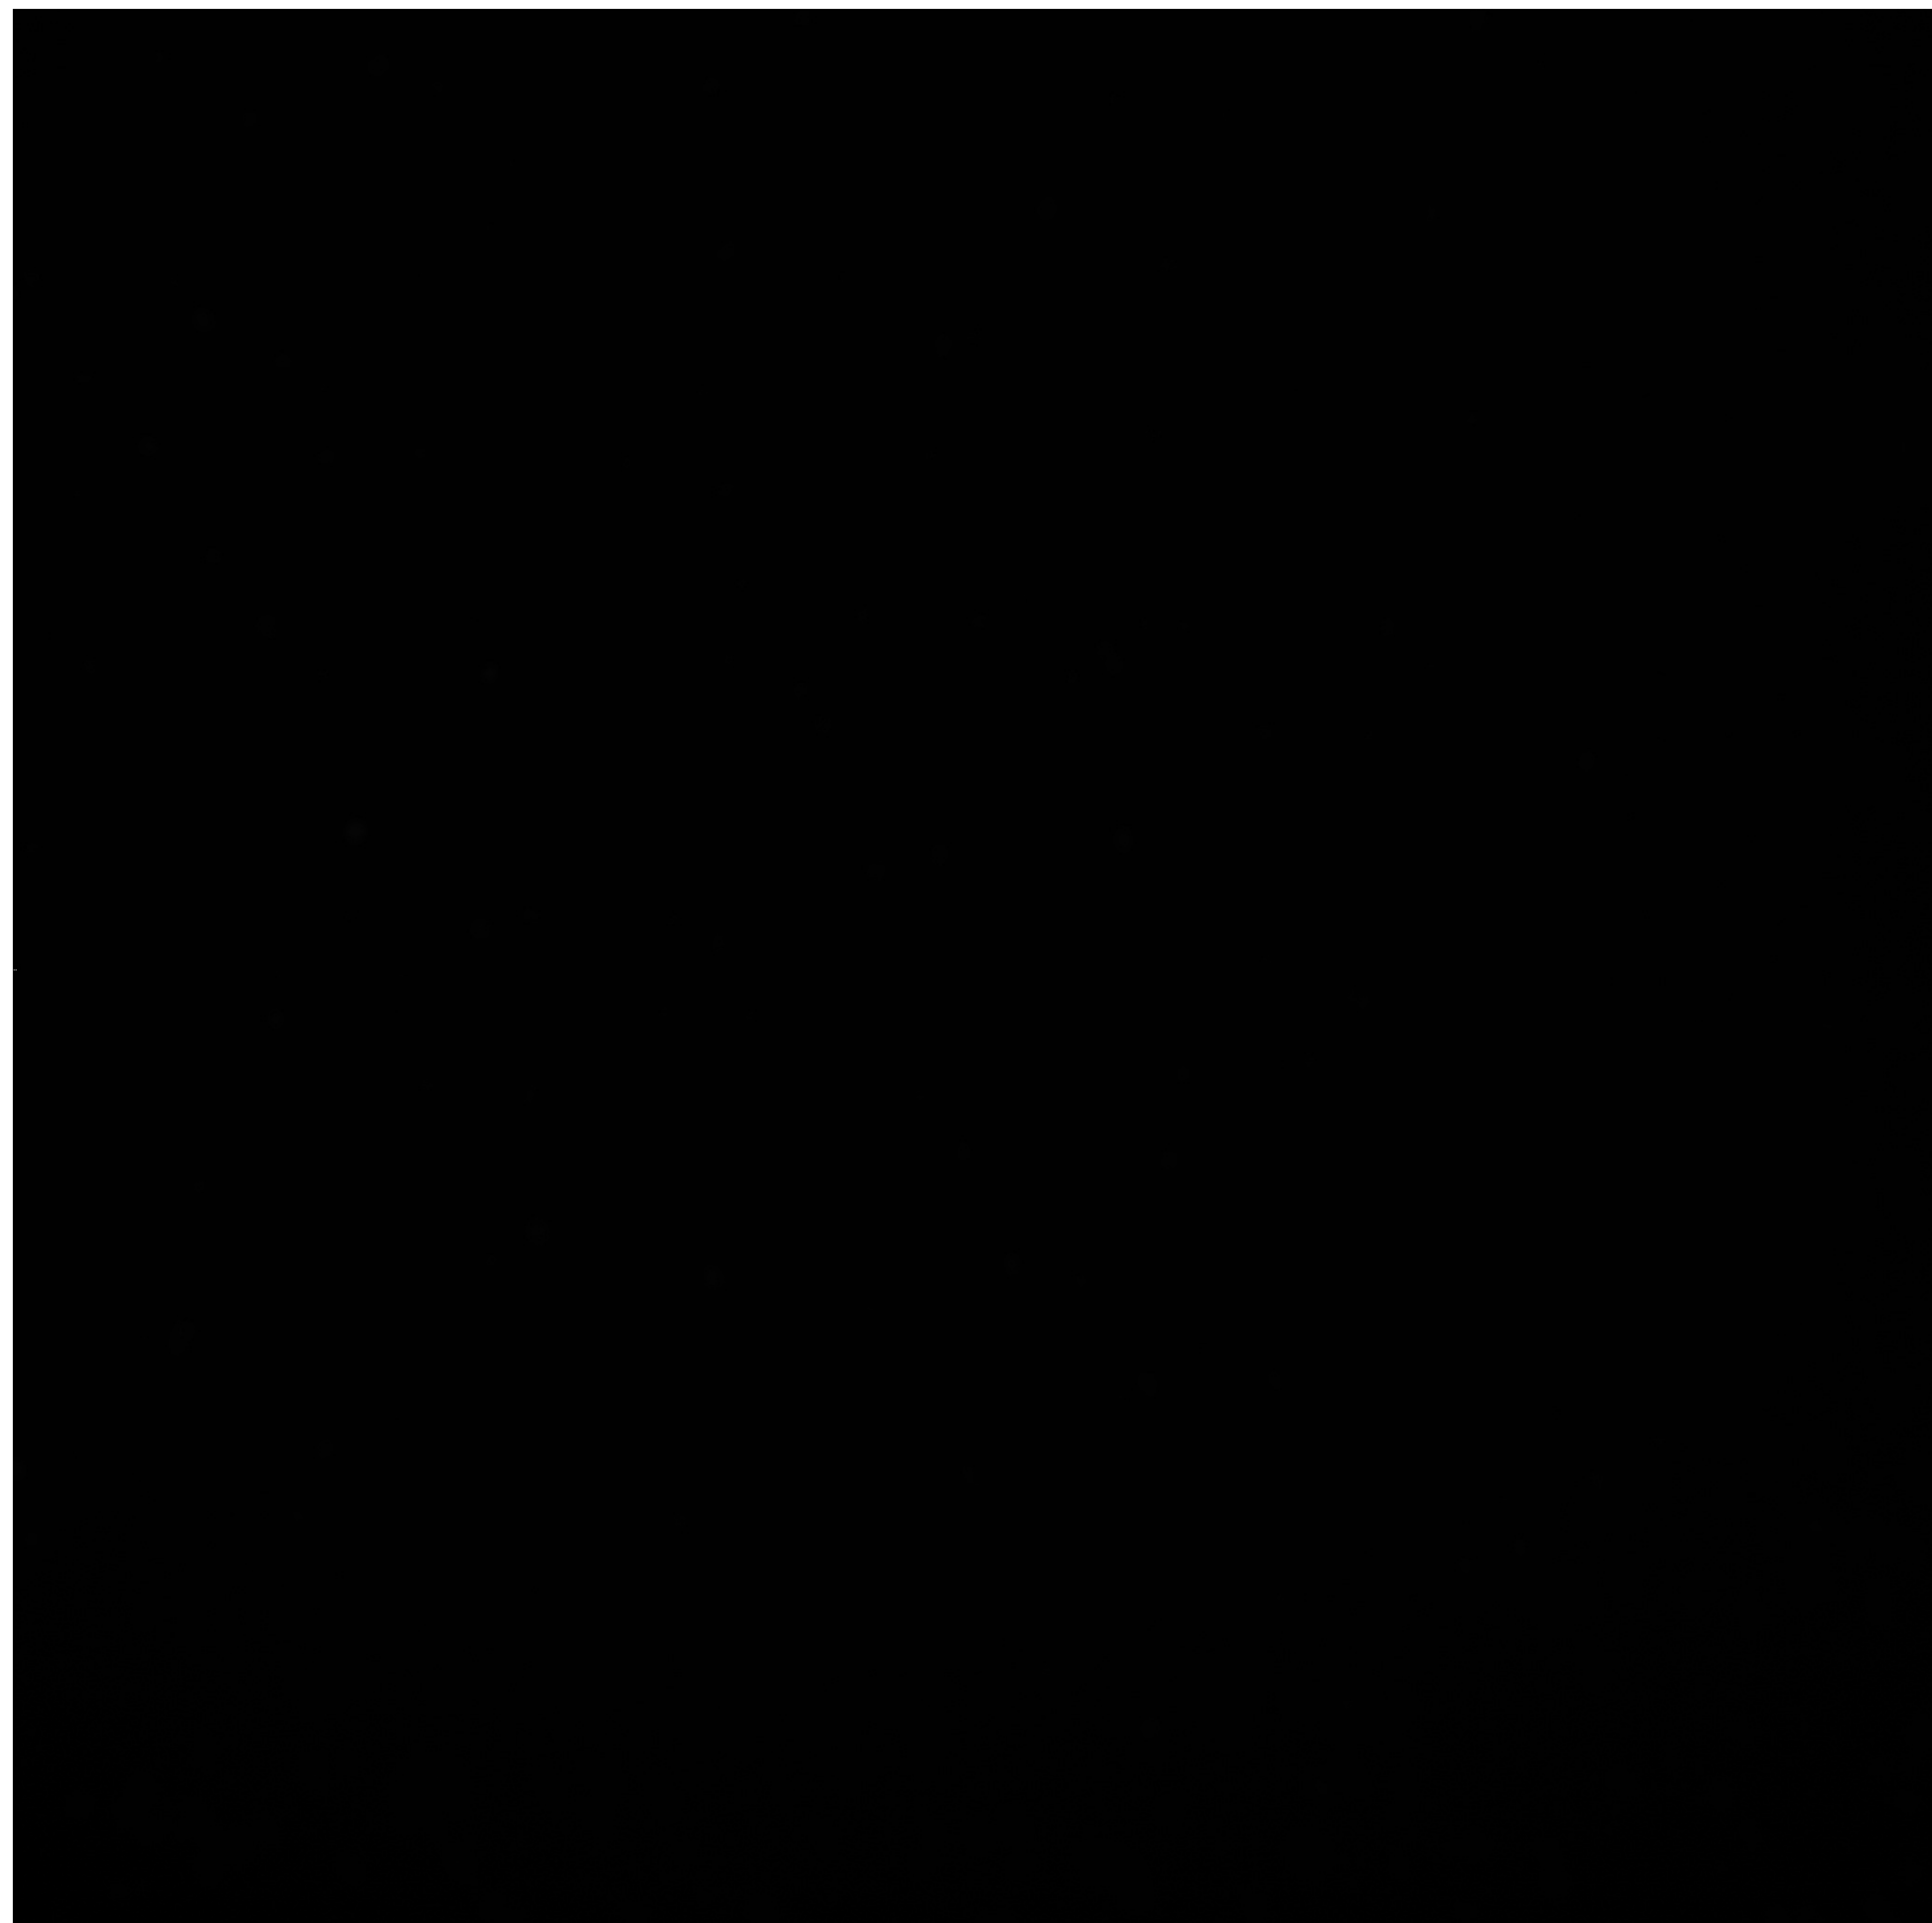

Supplement: RA-005-C5RA19497K-s001.pdf [file RA-005-C5RA19497K-s001.pdf]

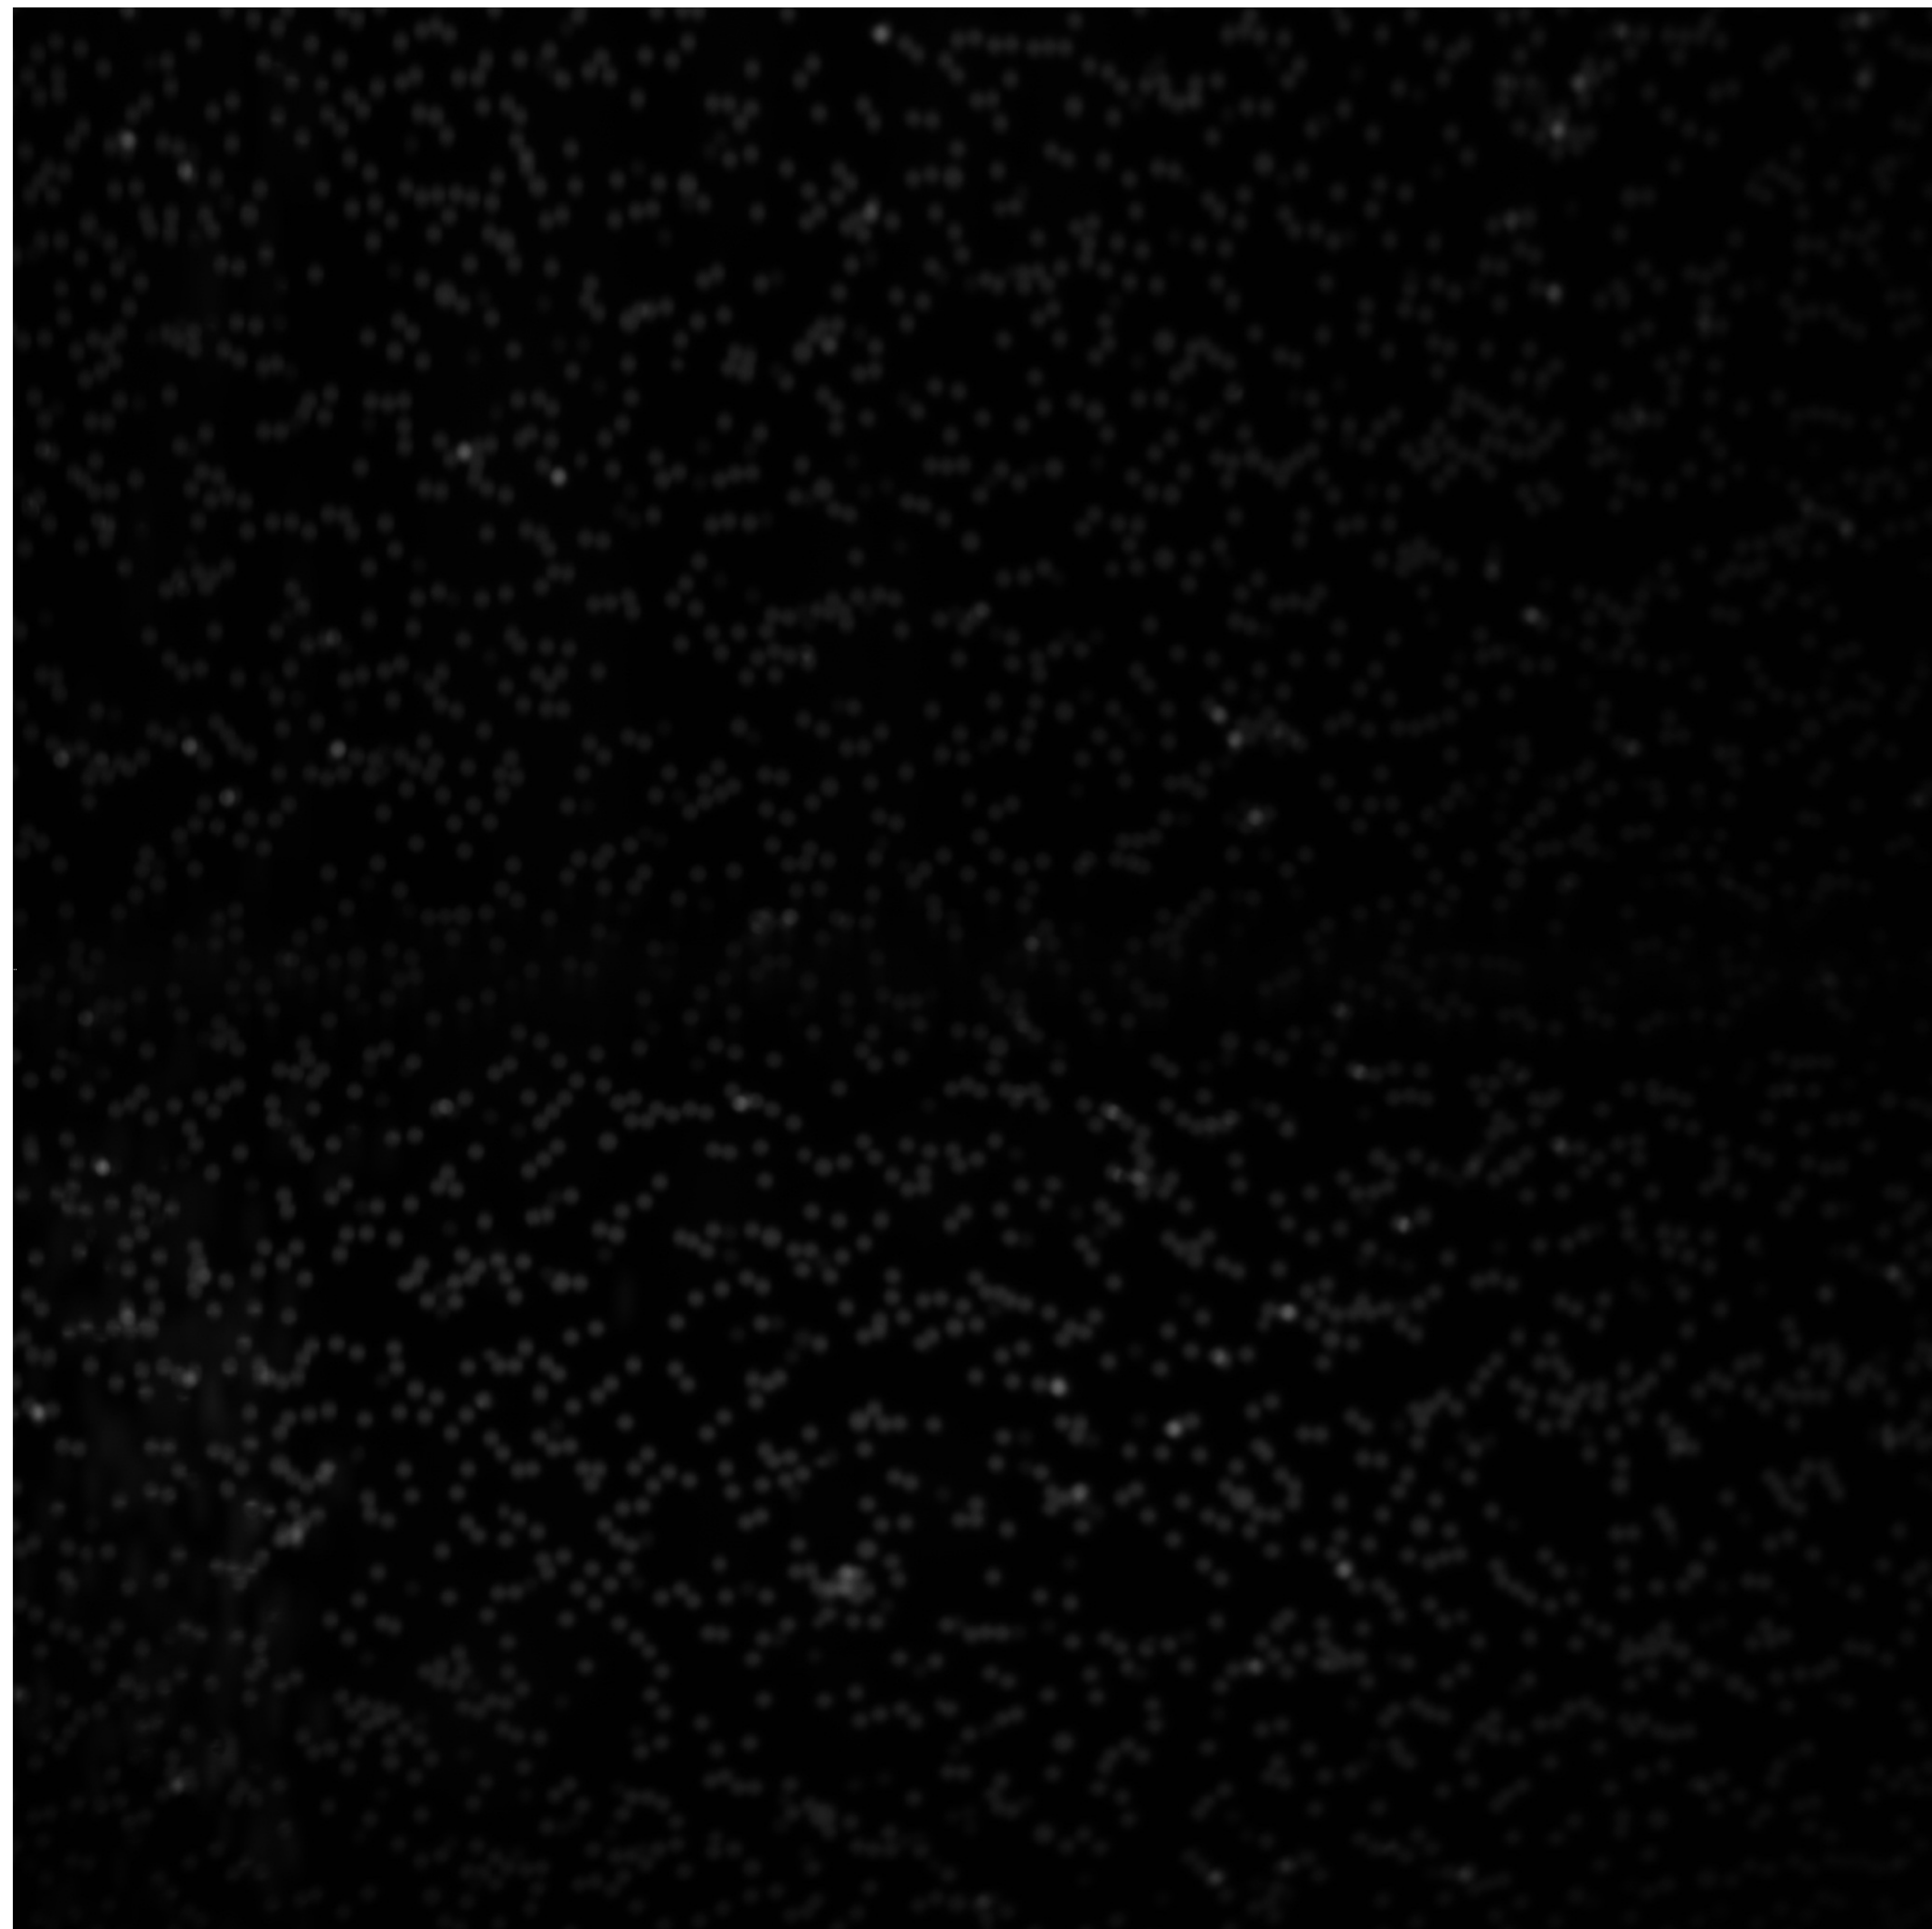

Supplement: RA-005-C5RA19497K-s002.pdf [file RA-005-C5RA19497K-s002.pdf]
